# Supplementary material
Source: Springer Nature journal article supplement (https://www.springermedizin.de/resource/supplementary/12885_2013_3894_MOESM1_ESM.pdf/9464718)

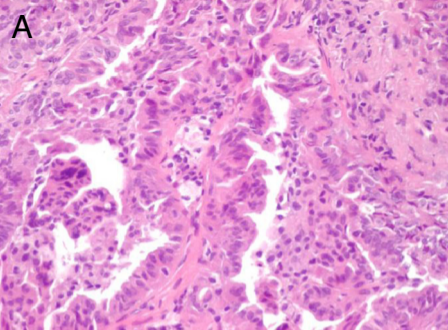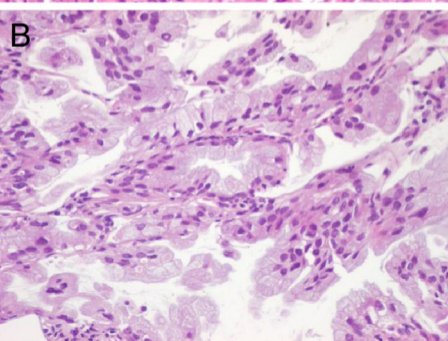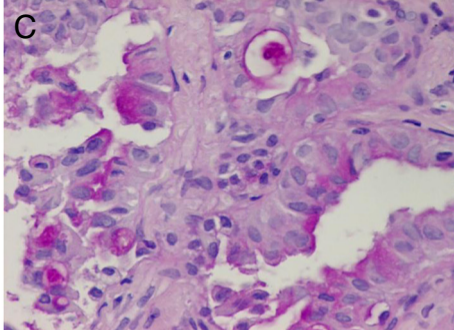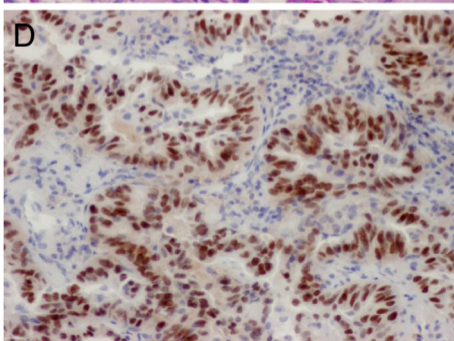

Supplement: MOESM1 [file 9464718]
